# Supplementary material
Source: PubMed Central journal article supplement (PMC6532766)
Supplement: NIHMS1020911-supplement-1.pdf [file NIHMS1020911-supplement-1.pdf]

**Supplemental Information**

**Circadian Clock Regulation of Hepatic Lipid**

**Metabolism by Modulation of m<sup>6</sup>A mRNA Methylation**

**Xiang Zhong, Jiayao Yu, Katya Frazier, Xiaocheng Weng, Yi Li, Candace M. Cham, Kyle Dolan, Xiaorong Zhu, Nathaniel Hubert, Yun Tao, Fanfei Lin, Kristina Martinez-Guryn, Yong Huang, Tian Wang, Jianzhao Liu, Chuan He, Eugene B. Chang, and Vanessa Leone**

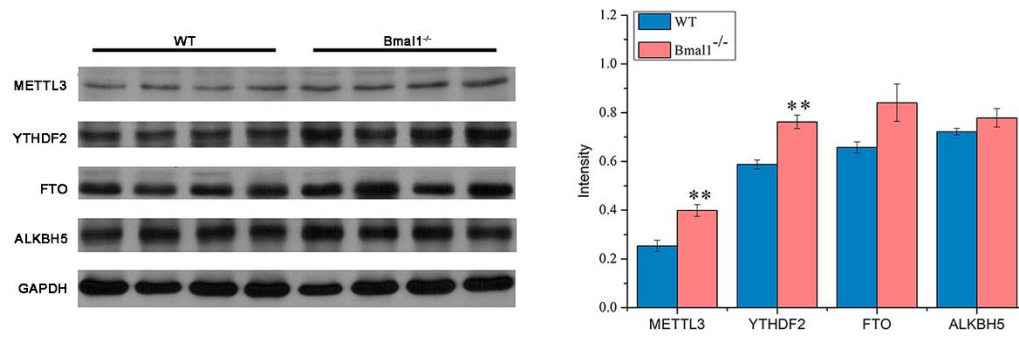

**Figure S1. Liver-specific *Bmal1*<sup>f/f</sup>-AlbCre-knockout affects m<sup>6</sup>A mRNA methylation in mice.**

Related to Figure 1. Western blotting was used to measure METTL3, YTHDF2, ALKBH5, and FTO protein levels in the liver of WT and *Bmal1*<sup>-/-</sup> mice at ZT0 ( $n = 4$  per group). WT: *Bmal1*<sup>f/f</sup>; *Bmal1*<sup>-/-</sup>: *Bmal1*<sup>f/f</sup>-AlbCre. All data are representative of three independent experiments. Data are represented as mean  $\pm$  SEM. \* $P < 0.05$ , \*\* $P < 0.01$  by two-tailed  $t$ -test.

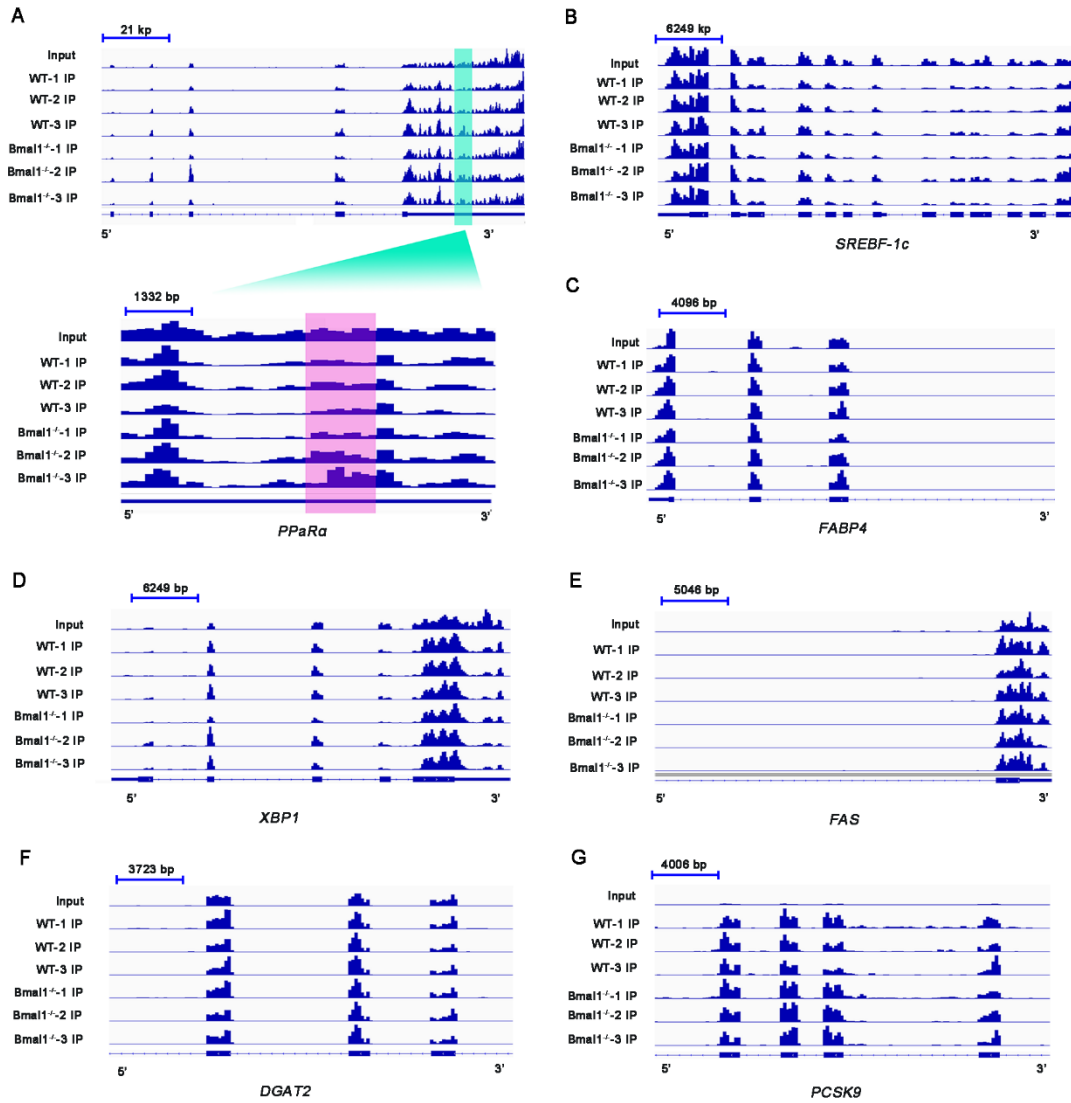

**Figure S2. Liver-specific Bmal1<sup>f/f</sup>-AlbCre-knockout changes *PPaRa* mRNA methylation in mice.**

Related to Figure 2. (A-G) Integrative genomics viewer (IGV) plots showing a increase in m<sup>6</sup>A methylated peaks for *PPaRa* mRNA, but no change for other lipid metabolism genes among the input samples, WT IP, and *Bmal1*<sup>-/-</sup> IP. Blue boxes represent exons ( $n = 3$  per group). WT: Bmal<sup>f/f</sup>, Bmal<sup>-/-</sup>: Bmal<sup>f/f</sup>-AlbCre.

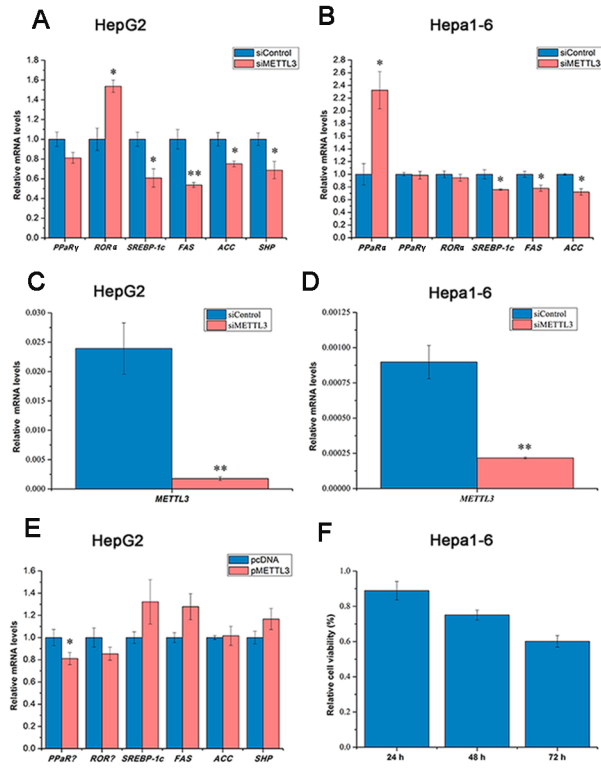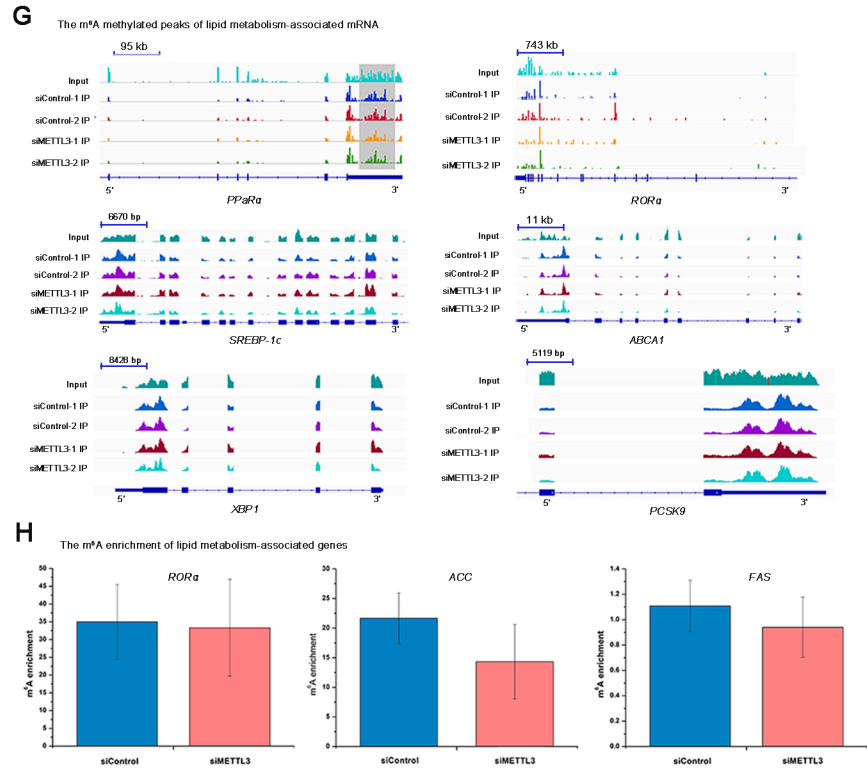

**Figure S3. Lipid metabolism gene expression, m<sup>6</sup>A methylated peaks and enrichment following knockdown or overexpression of *METTL3*.** Related to Figure 3. **(A)** Knockdown of *METTL3* changed mRNA expression of genes associated with lipid metabolism. Expression of *RORα* mRNA was significantly increased, however, expression of *SREBP-1c*, *Fas*, *ACC*, *SHP* mRNA were significantly decreased following si*METTL3* versus siControl in HepG2 cells ( $n = 3$ ). **(B)** *METTL3* knockdown significantly up-regulated expression of *PPaRα* mRNA and decreased expression of *SREBP-1c*, *Fas*, *ACC* mRNA in Hepa1-6 cells ( $n = 3$ ). **(C-D)** Expression of *METTL3* mRNA in HepG2 (C) and Hepa1-6 (D) cells after transfection of si*METTL3* versus siControl, respectively. The mRNA expression of *METTL3* in HepG2 cells is significantly higher than in Hepa1-6 cells ( $n = 3$ ). **(E)** Lipid metabolism genes expression following overexpression of *METTL3* in HepG2 cells. Difference of *RORα*, *SREBP-1c*, *Fas*, *ACC*, *SHP* mRNA were not observed by overexpression of *METTL3*, with the exception of decreased *PPaRγ* mRNA ( $n = 3$ ). **(F)** Knockdown of *METTL3* in Hepa1-6 cells reduced the relative cell viability determined by MTT at 24, 48, and 72 h after transfection ( $n = 6$ ). **(G)** Integrative genomics viewer (IGV) plots showing increase of *PPaRα* (A) in m<sup>6</sup>A methylated peaks, but no difference for, *RORα* (B), *SREBP-1c* (C), *ABCA1* (D), *XBPI* (E), and *PCSK9* (F) mRNA among the siControl IP and si*METTL3* IP. Blue boxes represent exons and blue lines represent introns.  $n = 2$ . **(H)** The m<sup>6</sup>A enrichment of *RORα*, *ACC*, and *FAS* mRNA in HepG2 cells at 48 h post-transfection ( $n = 3$ ). Data are representative of three independent experiments **(A-F, H)**. Data are represented as mean  $\pm$  SEM. \* $P < 0.05$ , \*\* $P < 0.01$  by two-tailed  $t$ -test.

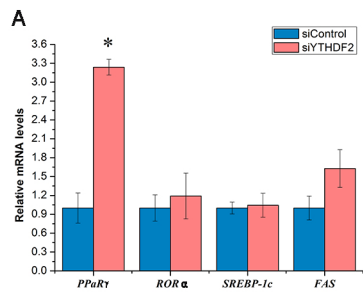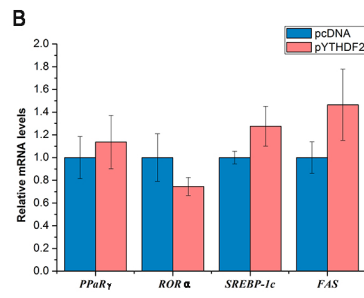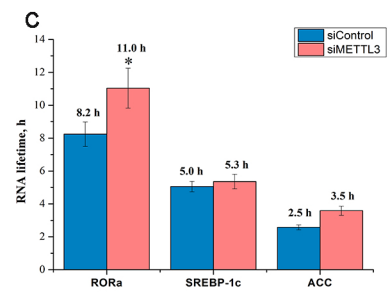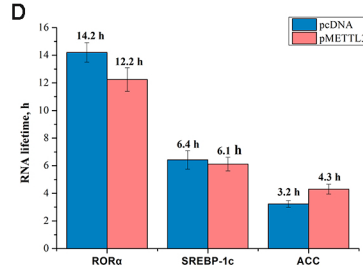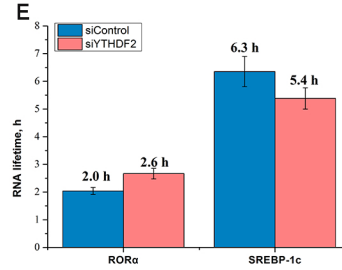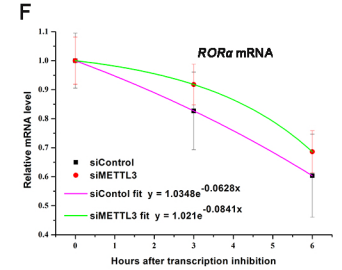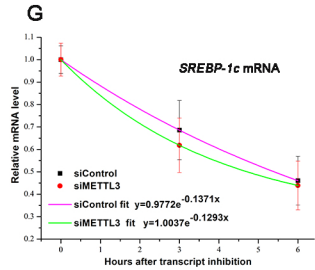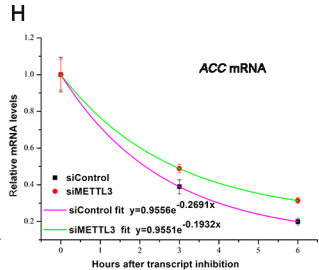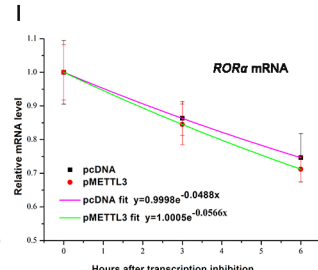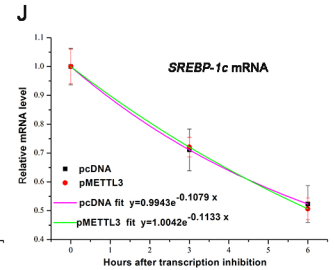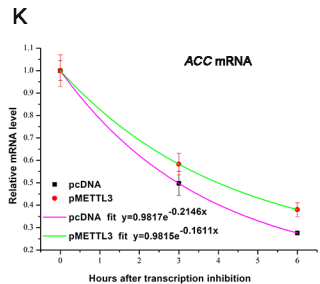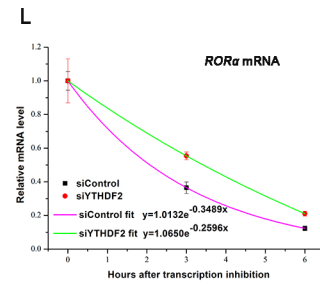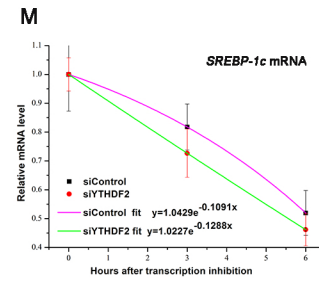

**Figure S4 Lifetimes of nascent mRNAs in HepG2 cells.** Related to Figure 4. **(A)** Effect of YTHDF2 knockdown on mRNA expression of genes associated with lipid metabolism in HepG2 cells. YTHDF2 knockdown did not affect *RORα*, *SREBP-1c*, and *Fas* mRNA expression, but increased expression of *PPaRγ* mRNA in HepG2 cells ( $n = 3$ ). **(B)** Expression of lipid metabolism genes in the sample of pYTHDF2 versus pcDNA in HepG2 cells. We did not observe any differences in *PPaRγ*, *RORα*, *SREBP-1c*, and *Fas* mRNA expression between pYTHDF2 and pcDNA ( $n = 3$ ). **(C-E)** Lifetime of *RORα*, *SREBP-1c*, and *ACC* mRNA in samples following knockdown of *METTL3* **(C)**, overexpression of *METTL3* **(D)**, and knockdown of *YTHDF2* **(E)** in HepG2 cells, respectively. HepG2 cells were treated with actinomycin for 0 h, 3 h, and 6 h before collection. Knockdown of *METTL3* significantly increased the lifetime of *PPaRα* and *RORα* mRNA, but had no impact on the lifetime of *SREBP-1c* and *ACC* mRNA in HepG2 cells. No differences were observed for the lifetime of *RORα*, *SREBP-1c*, and *ACC* mRNA following knockdown of YTHDF2, or overexpression of *METTL3* and YTHDF2 ( $n = 3$ ). **(F-M)** Decay of *RORα*, *SREBP-1c*, and *ACC* mRNA in samples following knockdown of *METTL3*, overexpression of *METTL3*, or knockdown of *YTHDF2* in HepG2 cells, respectively ( $n = 3$ ). All data are representative of three independent experiments. Data are represented as mean  $\pm$  SEM. \* $P < 0.05$ , \*\* $P < 0.01$  by two-tailed  $t$ -test.

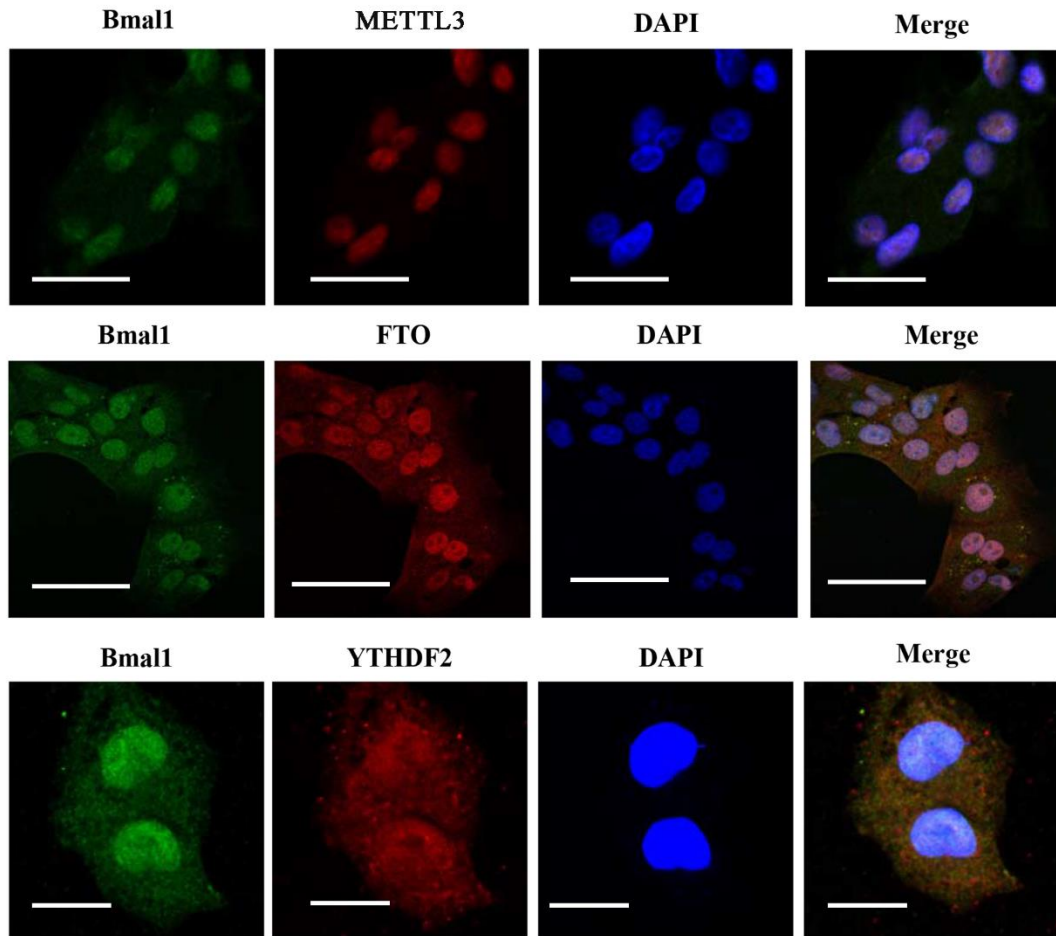

**Figure S5. The distribution of METTL3, YTHDF2, FTO, and BMAL1 protein.** Related to Figure 6.

The distribution of METTL3, YTHDF2, FTO, and BMAL1 proteins were examined by fluorescence immunostaining in HepG2 cells, indicating that METTL3, FTO, and BMAL1 were localized to the nucleus. Conversely, YTHDF2 was localized in both the nucleus and cytoplasm. Scale bar, 70  $\mu\text{m}$ . All data are representative of three independent experiments.

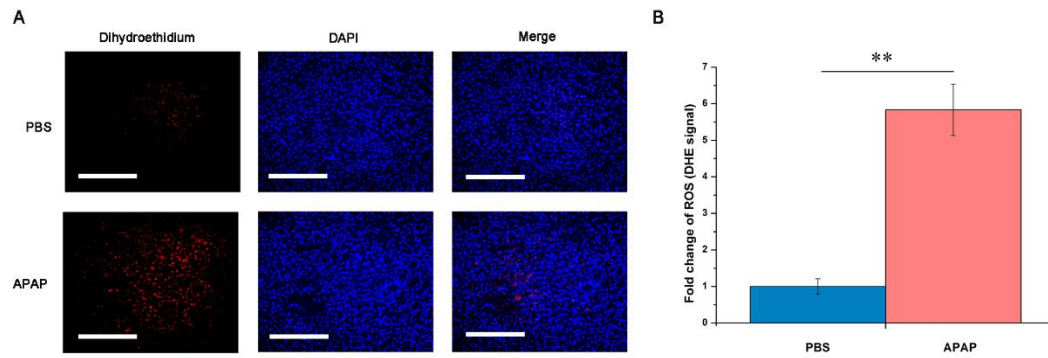

**Figure S6. Detection of ROS in mouse liver by dihydroethidium.** Related to Figure 6. **(A)** Representative images of ROS detection from dihydroethidium (DHE) stained liver sections from WT mice after acetaminophen (APAP) or PBS injection. Scale bar, 160  $\mu\text{m}$ . **(B)** Quantification of ROS formation was achieved by measuring mean grey values of DHE signal per cell using ImageJ software,  $n = 3$  per treatment. All data are representative of three independent experiments. Data are represented as mean  $\pm$  SEM.  $*P < 0.05$ ,  $**P < 0.01$  by two-tailed  $t$ -test.

**Table S1. RNA methylation gene and m<sup>6</sup>A abundance CircWave cosinor statistical output. Related to Figure 1**

| Genotype                                           | Gene             | F-statistic | P-value              | R <sup>2</sup> |
|----------------------------------------------------|------------------|-------------|----------------------|----------------|
| <b>M<sup>6</sup>A writer, eraser, reader genes</b> |                  |             |                      |                |
| WT                                                 | <i>METTL3</i>    | NA          | NA                   | 0              |
| WT                                                 | <i>METTL14</i>   | 12.9429     | 0.00017              | 0.52952        |
| WT                                                 | <i>FTO</i>       | 10.4670     | 0.00059              | 0.47649        |
| WT                                                 | <i>ALKBH5</i>    | 7.55569     | 0.00300              | 0.39651        |
| WT                                                 | <i>YTHDF2</i>    | 5.47771     | 0.01133              | 0.32264        |
| WT                                                 | m <sup>6</sup> A | 8.11851     | 0.00408              | 0.51980        |
| <i>Bmal1</i> <sup>-/-</sup>                        | <i>METTL3</i>    | 3.47356     | 0.04545              | 0.20465        |
| <i>Bmal1</i> <sup>-/-</sup>                        | <i>METTL14</i>   | 9.43082     | 0.00083              | 0.42044        |
| <i>Bmal1</i> <sup>-/-</sup>                        | <i>FTO</i>       | 5.28065     | 0.01160              | 0.28118        |
| <i>Bmal1</i> <sup>-/-</sup>                        | <i>ALKBH5</i>    | NA          | NA                   | 0              |
| <i>Bmal1</i> <sup>-/-</sup>                        | <i>YTHDF2</i>    | NA          | NA                   | 0              |
| <i>Bmal1</i> <sup>-/-</sup>                        | m <sup>6</sup> A | NA          | NA                   | 0              |
| <b>Lipid metabolism genes</b>                      |                  |             |                      |                |
| WT                                                 | <i>PPaRα</i>     | 26.92400    | 9X10 <sup>-7</sup>   | 0.70071        |
| WT                                                 | <i>PPARγ</i>     | 5.88272     | 0.00864              | 0.33842        |
| WT                                                 | <i>SHP</i>       | 6.38064     | 0.00625              | 0.35685        |
| WT                                                 | <i>RORα</i>      | 6.58642     | 0.00134              | 0.55645        |
| WT                                                 | <i>ACC</i>       | NA          | NA                   | 0              |
| WT                                                 | <i>FAS</i>       | NA          | NA                   | 0              |
| WT                                                 | <i>FABP4</i>     | NA          | NA                   | 0              |
| WT                                                 | <i>FABP1</i>     | 5.98018     | 0.0081               | 0.34211        |
| WT                                                 | <i>SREBP-1c</i>  | 5.18988     | 0.0138               | 0.31096        |
| <i>Bmal1</i> <sup>-/-</sup>                        | <i>PPARα</i>     | 10.8668     | 0.00034              | 0.44597        |
| <i>Bmal1</i> <sup>-/-</sup>                        | <i>PPARγ</i>     | 5.28796     | 0.01154              | 0.28145        |
| <i>Bmal1</i> <sup>-/-</sup>                        | <i>SHP</i>       | 5.30759     | 0.01138              | 0.2822         |
| <i>Bmal1</i> <sup>-/-</sup>                        | <i>RORα</i>      | NA          | NA                   | 0              |
| <i>Bmal1</i> <sup>-/-</sup>                        | <i>ACC</i>       | 3.6833      | 0.03851              | 0.21435        |
| <i>Bmal1</i> <sup>-/-</sup>                        | <i>FAS</i>       | 18.9886     | 7.1X10 <sup>-6</sup> | 0.58447        |
| <i>Bmal1</i> <sup>-/-</sup>                        | <i>FABP4</i>     | NA          | NA                   | 0              |
| <i>Bmal1</i> <sup>-/-</sup>                        | <i>FABP1</i>     | NA          | NA                   | 0              |
| <i>Bmal1</i> <sup>-/-</sup>                        | <i>SREBP-1c</i>  | NA          | NA                   | 0              |

NA: Not available, No significant co-sinor pattern detected

**Table S2. Primers for qRT-PCR. Related to KEY RESOURCES TABLE.**

| Gene                           | Forward                 | Reverse                 | Accession Number |
|--------------------------------|-------------------------|-------------------------|------------------|
| <b>Mouse</b>                   |                         |                         |                  |
| <i>METTL3</i>                  | AGCAGAGCAAGAGACGAATTATC | GGTGGAAAGAGTCGATCAGCA   | AF135789         |
| <i>METTL14</i>                 | CTGAGAGTGCGGATAGCATTG   | GAGCAGATGTATCATAGGAAGCC | NM_201638.2      |
| <i>ALKBH5</i>                  | CGCGGTCATCAACGACTACC    | ATGGGCTTGAAGTGAAGTTG    | XM_021176347.1   |
| <i>YTHDF2</i>                  | GAGCAGAGACCAAAAGGTCAAG  | CTGTGGGCTCAAGTAAGTTTC   | XM_021160169.1   |
| <i>FTO</i>                     | TTCATGCTGGATGACCTCAATG  | GCCAACTGACAGCGTTCTAAG   | NM_011936.2      |
| <i>PPAR<math>\alpha</math></i> | TGCAAACCTTGGACTTGAACG   | AGGAGGACAGCATCGTGAAG    | XM_021183376.1   |
| <i>PPAR<math>\delta</math></i> | CAAGTGGGGTCAGTCATGGAA   | GCTGGAAGGAAGCGTGTGTT    | U01665           |
| <i>PPAR<math>\gamma</math></i> | CTGACAGGACTGTGTGAC      | TCTGTGTCAACCATGGTAAT    | XM_021164280.1   |
| <i>ROR<math>\alpha</math></i>  | ACGCCACCTACAACATCTC     | TGCCCATCCATATAGGTGCT    | XM_021171874.1   |
| <i>SREBP-1c</i>                | GGAGCCATGGATTGCACATT    | GGCCCGGGAAGTCACTGT      | XM_006532716.2   |
| <i>ACC</i>                     | GCCTCCGTCAGCTCAGATAC    | ATGTGAAAGGCCAAACCATC    | XM_021178352.1   |
| <i>FAS</i>                     | ATCCCAGCACTTCTTGATGG    | CCGAAGCCAAATGAGTTGAT    | XM_021177126.1   |
| <i>FABP1</i>                   | CATCCAGAAAGGGAAGGACA    | CTTCCCTTCATGCACGATTT    | NM_017399.4      |
| <i>FABP4</i>                   | CTTTGCCACAAGGAAAGTGG    | TCCCCATTTACGCTGATGAT    | XM_006530048.3   |
| <i>FATP4</i>                   | ACTGTTCTCCAAGCTAGTGCT   | GATGAAGACCCGGATGAAACG   | NM_011989.4      |
| <i>SHP</i>                     | TGGGTCCCAAGGAGTATGC     | GCTCCAAGACTTCACACAGTG   | NM_011850.3      |
| <i>GAPDH</i>                   | GGCAAATTCAACGGCACAGT    | AGATGGTGATGGGCTTCCC     | NM_001289726.1   |
| <i>HPRT1</i>                   | TCAGTCAACGGGGGACATAAA   | GGGGCTGTACTGCTTAACCAG   | NM_013556.2      |
| <b>Human</b>                   |                         |                         |                  |
| <i>METTL3</i>                  | CAAGCTGCACTTCAGACGAA    | GCTTGGCGTGTGGTCTTT      | NM_019852.4      |
| <b>Continued</b>               |                         |                         |                  |

|                                |                           |                           |                |
|--------------------------------|---------------------------|---------------------------|----------------|
| <i>METTL14</i>                 | AGAAACTTGCAGGGCTTCCT      | TCTTCTTCATATGGCAAATTTTCTT | NM_020961.3    |
| <i>ALKBH5</i>                  | CGGCGAAGGCTACACTTACG      | CCACCAGCTTTTGGATCACCA     | NM_017758.3    |
| <i>YTHDF1</i>                  | ACCTGTCCAGCTATTACCCG      | TGGTGAGGTATGGAATCGGAG     | NM_017798.3    |
| <i>YTHDF2</i>                  | CCTTAGGTGGAGCCATGATTG     | TCTGTGCTACCCAACTTCAGT     | NM_001172828.1 |
| <i>FTO</i>                     | ACTTGGCTCCCTTATCTGACC     | GTGCAGTGTGAGAAAGGCTT      | NM_001080432.2 |
| <i>PPAR<math>\alpha</math></i> | GGATGCTGGTAGCGTATGGA      | GGACGATCTCCACAGCAAAT      | NM_005036.4    |
| <i>PPAR<math>\delta</math></i> | TCTACAATGCCTACCTGAAAACTTC | ACAATGTCTCGATGTCGTGGATC   | NM_001171820.1 |
| <i>ROR<math>\alpha</math></i>  | ACTCCTGTCCTCGTCAGAAGA     | CATCCCTACGGCAAGGCATTT     | NM_002943.3    |
| <i>SREBP-1c</i>                | CGCCACCTGCCCCCTCTCCTTCC   | TGCCCTGCCACCTATCCTCTCACG  | NM_004599.3    |
| <i>ACC</i>                     | ATGTCTGGCTTGCACCTAGTA     | CCCCAAAGCGAGTAACAAATTCT   | NM_198836.2    |
| <i>FAS</i>                     | TCGTGGGCTACAGCATGGT       | GCCCTCTGAAGTCGAAGAAGAA    | NM_004104.4    |
| <i>FABP4</i>                   | ACTGGGCCAGGAATTTGACG      | CTCGTGGAAGTGACGCCTT       | NM_001442.2    |
| <i>FATP4</i>                   | GTGAAGGCAAAGGTGCGAC       | CGGAAGGTCCAGTGGGTATC      | NM_005094.3    |
| <i>SHP</i>                     | GTGCCCAGCATACTCAAGAAG     | TGGGGTCTGTCTGGCAGTT       | NM_021969.2    |
| <i>GAPDH</i>                   | CGACCACTTTGTCAAGCTCA      | AGGGGAGATTCAGTGTGGTG      | NM_001289746.1 |
| <i>HPRT1</i>                   | TGACACTGGCAAAACAATGCA     | GGTCCTTTTCACCAGCAAGCT     | NM_000194.2    |
